# Supplementary material for: Role of Decompressive Surgery in Neurologically Intact Patients with Low to Intermediate Intraspinal Metastatic Tumor Burden
Source: MDPI journal article supplement (doi:10.3390/cancers15020385), 2023-01-06
Supplement: s1 [file s1]

# Supplementary Materials: Role of Decompressive Surgery in Neurologically Intact Patients with Low to Intermediate Intraspinal Metastatic Tumor Burden

Niklas von Spreckelsen, Julian Ossmann, Maximilian Lenz, Lukas Nadjiri, Moritz Lenschow, Sergej Telentschak, Johanna Meyer, Julia Keßling, Peter Knöll, Peer Eyse, Roland Goldbrunner, Moritz Perrech, Max Scheyerer, Eren Celik, Kourosh Zarghooni and Volker Neuschmelting

Table S1. Clinical characteristics.

|                                   | Decompressive                | Non-decompressive          | Overall                      | p-Value |
|-----------------------------------|------------------------------|----------------------------|------------------------------|---------|
| Number of cases                   | 145                          | 36                         | 181                          |         |
| Number of patients                | 139*                         | 35*                        | 173                          |         |
| Number of men                     | 80 (57.6%)                   | 21 (60.0%)                 | 101 (58.4%)                  | 0.793   |
| Number of women                   | 59 (42.4%)                   | 14 (40.0%)                 | 72 (41.6%)                   |         |
| Age at first consultation [years] | <i>n</i> = 139               | <i>n</i> = 35              | <i>n</i> = 173               |         |
| Mean                              | 64.1                         | 62.7                       | 63.7                         |         |
| SD                                | 12.2                         | 13.6                       | 12.4                         |         |
| Median                            | 65                           | 64                         | 65                           | 0.745   |
| Minimum                           | 13                           | 32                         | 13                           |         |
| Maximum                           | 87                           | 84                         | 87                           |         |
| Diabetes mellitus                 | <i>n</i> = 143<br>27 (18.9%) | <i>n</i> = 36<br>7 (19.4%) | <i>n</i> = 179<br>34 (19.0%) | 0.939   |
| Atherosclerosis                   | <i>n</i> = 143<br>20 (14.0%) | <i>n</i> = 36<br>5 (13.9%) | <i>n</i> = 179<br>25 (14.0%) |         |
| COPD/Nicotine abuse               | <i>n</i> = 143<br>29 (20.3%) | <i>n</i> = 36<br>9 (25.0%) | <i>n</i> = 179<br>38 (21.2%) | 0.536   |
| Thrombosis/PE                     | <i>n</i> = 143<br>7 (4.9%)   | <i>n</i> = 36<br>0 (0.0%)  | <i>n</i> = 179<br>7 (3.9%)   |         |
| Obesity                           | <i>n</i> = 143<br>17 (11.9%) | <i>n</i> = 36<br>4 (11.1%) | <i>n</i> = 179<br>21 (11.7%) | >0.999  |
| Osteoporosis                      | <i>n</i> = 142<br>4 (2.8%)   | <i>n</i> = 36<br>3 (8.3%)  | <i>n</i> = 178<br>7 (3.9%)   |         |
| Glucocorticoid therapy            | <i>n</i> = 143<br>10 (7.0%)  | <i>n</i> = 36<br>4 (11.1%) | <i>n</i> = 179<br>14 (7.8%)  | 0.485   |
| Primary tumors                    | <i>n</i> = 145               | <i>n</i> = 36              | <i>n</i> = 181               |         |
| Adrenal gland                     | 1 (0.7%)                     | 1 (2.8%)                   | 2 (1.1%)                     |         |
| Kidney                            | 17 (11.7%)                   | 1 (2.8%)                   | 18 (9.9%)                    |         |
| Breast                            | 32 (22.1%)                   | 12 (33.3%)                 | 44 (24.3%)                   |         |
| Lymphoma                          | 5 (3.4%)                     | 1 (2.8%)                   | 6 (3.3%)                     |         |
| SCLC                              | 5 (3.4%)                     | 0 (0.0%)                   | 5 (2.8%)                     |         |
| NSCLC                             | 19 (13.1%)                   | 12 (33.3%)                 | 31 (17.1%)                   |         |
| Thyroid gland                     | 5 (3.4%)                     | 1 (2.8%)                   | 6 (3.3%)                     |         |
| Multiple Myeloma                  | 7 (4.8%)                     | 1 (2.8%)                   | 8 (4.4%)                     | 0.126   |
| Prostate                          | 25 (17.2%)                   | 2 (5.6%)                   | 27 (14.9%)                   |         |
| Sarcoma                           | 4 (2.8%)                     | 0 (0.0%)                   | 4 (2.2%)                     |         |
| CUP                               | 7 (4.8%)                     | 0 (0.0%)                   | 7 (3.9%)                     |         |
| Pharynx/mouth/tonsils             | 2 (1.4%)                     | 1 (2.8%)                   | 3 (1.7%)                     |         |
| Gastrointestinal                  | 10 (6.9%)                    | 4 (11.1%)                  | 14 (7.7%)                    |         |
| Urothelium                        | 2 (1.4%)                     | 0 (0.0%)                   | 2 (1.1%)                     |         |
| Melanoma                          | 2 (1.4%)                     | 0 (0.0%)                   | 2 (1.1%)                     |         |
| Others                            | 2 (1.4%)                     | 0 (0.0%)                   | 2 (1.1%)                     |         |
| Cervical spine involved           | <i>n</i> = 145               | <i>n</i> = 36              | <i>n</i> = 181               | 0.073   |

|                         |                |               |                |        |
|-------------------------|----------------|---------------|----------------|--------|
|                         | 25 (17.2%)     | 11 (30.6%)    | 36 (19.9%)     |        |
| Thoracic spine involved | <i>n</i> = 145 | <i>n</i> = 36 | <i>n</i> = 181 | 0.888  |
|                         | 103 (71.0%)    | 26 (72.2%)    | 129 (71.3%)    |        |
| Lumbar spine involved   | <i>n</i> = 145 | <i>n</i> = 36 | <i>n</i> = 181 | 0.851  |
|                         | 71 (49.0%)     | 17 (47.2%)    | 88 (48.6%)     |        |
| Sacrum involved         | <i>n</i> = 145 | <i>n</i> = 36 | <i>n</i> = 181 | >0.999 |
|                         | 11 (7.6%)      | 2 (5.6%)      | 13 (7.2%)      |        |
| SINS                    | <i>n</i> = 144 | <i>n</i> = 36 | <i>n</i> = 180 |        |
| Stable (0–6)            | 4 (2.8%)       | 2 (5.6%)      | 6 (3.3%)       |        |
| Intermediate (7–12)     | 94 (65.3%)     | 27 (75%)      | 121 (67.2%)    | 0.228  |
| Unstable (13–18)        | 46 (31.9%)     | 7 (19.4%)     | 53 (29.4%)     |        |
| KPS [%]                 | <i>n</i> = 145 | <i>n</i> = 36 | <i>n</i> = 181 |        |
| 40                      | 1 (0.7%)       | 1 (2.8%)      | 2 (1.1%)       |        |
| 50                      | 18 (12.4%)     | 3 (8.3%)      | 21 (11.6%)     |        |
| 60                      | 48 (33.1%)     | 9 (25.0%)     | 57 (31.5%)     | 0.253  |
| 70                      | 67 (46.2%)     | 18 (50.0%)    | 85 (47.0%)     |        |
| 80                      | 11 (7.6%)      | 4 (11.1%)     | 15 (8.3%)      |        |
| 90                      | 0 (0.0%)       | 1 (2.8%)      | 1 (0.6%)       |        |
| Follow-up (months)      | <i>n</i> = 145 | <i>n</i> = 36 | <i>n</i> = 181 |        |
| Median                  | 3              | 9             | 3              |        |
| IQR                     | 12–0           | 15–1          | 12–0.5         | 0.159  |
| Minimum                 | 0              | 0             | 0              |        |
| Maximum                 | 79             | 50            | 79             |        |

\*The sum of patient numbers of both cohorts (*n* = 174) is lower than the reported cases (*n* = 181). If patients were treated twice but for a different metastatic lesion / spinal level 3 or more months apart, these were considered separate cases.
